# Supplementary material for: RNA 3D structure prediction guided by independent folding of homologous sequences
Source: BMC Bioinformatics. 2019 Oct 22;20:512. doi: 10.1186/s12859-019-3120-y (PMC6806525; doi:10.1186/s12859-019-3120-y)
Supplement: Supplementary file 5 — Additional file 5: Summary of analysis for Fig. 6. [file 12859_2019_3120_MOESM5_ESM.xls]

## Sheet: RMSD
	Method \ RMSD	Ade	trna	tpp	gmp	thf	rp13	rp14	rp17	Median	Mean
1	Rosetta	9.02	13.55	19.39	11	5.07	9.96	5.76	14.18	10.48	10.9913
2	Rosetta Top1k	11.73	14.75	18.04	9.85	5.01	6.34	5.31	13.63	10.79	10.5825
3	Evo|Rosetta	12.98	14.75	15.75	13.7	5.05	6.34	5.31	13.63	13.305	10.9388
4	SimRNA	6.98	14.43	22.62	12.09	11.4	8.36	6.29	15.72	11.745	12.2363
5	SimRNA Top1k	7.24	15.68	24.84	12.37	10.5	9.46	9.05	8.99	9.98	12.2662
6	Evo|SimRNA	9.99	10.29	24.84	9.64	10.5	8.26	8.87	15.94	10.14	12.2913
7	Rosetta+SimRNA	8.6	15.68	24.84	12.59	10.5	10.52	5.31	13.7	11.555	12.7175
8	Evo|Rosetta+SimRNA	7.24	12.65	24.84	9.64	10.5	10.52	5.31	15.94	10.51	12.08
		6.98	10.29	15.75	9.64	5.01	6.34	5.31	8.99	9.98	10.5825

## Sheet: Core RMSD
Method \ Core RMSD	Ade	trna	tpp	gmp	thf	rp13	rp14	rp17	Median	Mean
Rosetta	7.32	13.11	17.55	11.41	4.59	8.32	4.52	11.74	9.87	9.82
Rosetta Top1k	11.36	14.6	17.09	10.18	4.79	4.41	4.83	13.37	10.77	10.08
Evo|Rosetta	11.68	14.6	13.92	15.85	6.54	4.41	4.83	13.37	12.53	10.65
SimRNA	5.09	14.37	22.37	12.26	11.87	6.42	4.71	16.72	12.07	11.73
SimRNA Top1k	5.78	14.52	24.08	12.72	11.11	7.69	7.13	8.75	9.93	11.47
Evo|SimRNA	9.55	9.97	24.08	9.65	11.52	6.73	7.45	13.6	9.81	11.57
Rosetta+SimRNA	6.73	14.52	24.08	13.09	11.11	10.2	4.83	13.31	12.1	12.23
Evo|Rosetta+SimRNA	5.63	12.16	24.08	8.76	11.52	10.2	4.83	16.64	10.86	11.73
	5.09	9.97	13.92	8.76	4.59	4.41	4.52	8.75

## Sheet: INFs
	Methods \ INFs	Ade	tRNA	TPP	GMP	THF	RP13	RP14	RP17	Median	Mean
1	Rosetta	0.743	0.775	0.776	0.831	0.818	0.779	0.917	0.698	0.7775	0.792125
2	Rosetta Top1k	0.771	0.815	0.763	0.802	0.479	0.784	0.895	0.714	0.7775	0.752875
3	Evo|Rosetta	0.79	0.815	0.763	0.833	0.459	0.784	0.519	0.714	0.7735	0.709625
4	SimRNA	0.731	0.689	0.677	0.741	0.745	0.784	0.895	0.577	0.736	0.729875
5	SimRNA Top1k	0.743	0.754	0.679	0.687	0.723	0.808	0.873	0.572	0.733	0.729875
6	Evo|SimRNA	0.688	0.396	0.679	0.667	0.723	0.769	0.494	0.556	0.673	0.6215
7	Rosetta+SimRNA	0.757	0.754	0.679	0.714	0.723	0.818	0.917	0.572	0.7385	0.74175
8	Evo|Rosetta+SimRNA	0.443	0.721	0.679	0.389	0.723	0.818	0.519	0.556	0.6175	0.606
		0.79	0.815	0.776	0.833	0.818	0.818	0.917	0.714	0.7775	0.792125

## Sheet: RMSD Pivot
Method \ RMSD	Evo|Rosetta	Evo|Rosetta+SimRNA	Evo|SimRNA	Rosetta	Rosetta Top1k	Rosetta+SimRNA	SimRNA	SimRNA Top1k
Ade	12.98	7.24	9.99	9.02	11.73	8.6	6.98	7.24
Mean	10.9388	12.08	12.2912	10.9913	10.5825	12.7175	12.2363	12.2662
Median	13.305	10.51	10.14	10.48	10.79	11.555	11.745	9.98
gmp	13.7	9.64	9.64	11	9.85	12.59	12.09	12.37
rp13	6.34	10.52	8.26	9.96	6.34	10.52	8.36	9.46
rp14	5.31	5.31	8.87	5.76	5.31	5.31	6.29	9.05
rp17	13.63	15.94	15.94	14.18	13.63	13.7	15.72	8.99
thf	5.05	10.5	10.5	5.07	5.01	10.5	11.4	10.5
tpp	15.75	24.84	24.84	19.39	18.04	24.84	22.62	24.84
trna	14.75	12.65	10.29	13.55	14.75	15.68	14.43	15.68

## Sheet: Core RMSD Pivot
Method \ Core RMSD	Evo|Rosetta	Evo|Rosetta+SimRNA	Evo|SimRNA	Rosetta	Rosetta Top1k	Rosetta+SimRNA	SimRNA	SimRNA Top1k
Ade	11.68	5.63	9.55	7.32	11.36	6.73	5.09	5.78
Mean	10.65	11.73	11.57	9.82	10.08	12.23	11.73	11.47
Median	12.53	10.86	9.81	9.87	10.77	12.1	12.07	9.93
gmp	15.85	8.76	9.65	11.41	10.18	13.09	12.26	12.72
rp13	4.41	10.2	6.73	8.32	4.41	10.2	6.42	7.69
rp14	4.83	4.83	7.45	4.52	4.83	4.83	4.71	7.13
rp17	13.37	16.64	13.6	11.74	13.37	13.31	16.72	8.75
thf	6.54	11.52	11.52	4.59	4.79	11.11	11.87	11.11
tpp	13.92	24.08	24.08	17.55	17.09	24.08	22.37	24.08
trna	14.6	12.16	9.97	13.11	14.6	14.52	14.37	14.52

## Sheet: INFs Pivot
Methods \ INFs	Evo|Rosetta	Evo|Rosetta+SimRNA	Evo|SimRNA	Rosetta	Rosetta Top1k	Rosetta+SimRNA	SimRNA	SimRNA Top1k
Ade	0.79	0.443	0.688	0.743	0.771	0.757	0.731	0.743
GMP	0.833	0.389	0.667	0.831	0.802	0.714	0.741	0.687
Mean	0.709625	0.606	0.6215	0.792125	0.752875	0.74175	0.729875	0.729875
Median	0.7735	0.6175	0.673	0.7775	0.7775	0.7385	0.736	0.733
RP13	0.784	0.818	0.769	0.779	0.784	0.818	0.784	0.808
RP14	0.519	0.519	0.494	0.917	0.895	0.917	0.895	0.873
RP17	0.714	0.556	0.556	0.698	0.714	0.572	0.577	0.572
THF	0.459	0.723	0.723	0.818	0.479	0.723	0.745	0.723
TPP	0.763	0.679	0.679	0.776	0.763	0.679	0.677	0.679
tRNA	0.815	0.721	0.396	0.775	0.815	0.754	0.689	0.754
