# Supplementary material for: RNA 3D structure prediction guided by independent folding of homologous sequences
Source: BMC Bioinformatics. 2019 Oct 22;20:512. doi: 10.1186/s12859-019-3120-y (PMC6806525; doi:10.1186/s12859-019-3120-y)
Supplement: Supplementary file 7 — Additional file 7: All data required to generate Fig. 6. [file 12859_2019_3120_MOESM7_ESM.xls]

## Sheet: inf_all_rnas_1of6
	target	fn	inf_all	inf_stack	inf_WC	inf_nWC	sns_WC	ppv_WC	sns_nWC	ppv_nWC	mode	rna	type
4	1y26_rpr_ref.pdb.outCR	c1_tar_min.out.10.pdb.outCR	0.729	0.702	0.934	0.387	0.913	0.955	0.3	0.5	Rosetta Top1k	ade	Rosetta
27	1y26_rpr_ref.pdb.outCR	c1_tar_min.out.10.pdb.outCR	0.729	0.702	0.934	0.387	0.913	0.955	0.3	0.5	Evo|Rosetta	ade	Rosetta
19	1y26_rpr_ref.pdb.outCR	c1_tar_c.0.0.pdb.outCR	0.743	0	0.894	0.283	0.913	0.875	0.2	0.4	Rosetta	ade	Rosetta
6	1y26_rpr_ref.pdb.outCR	c1_tar_ade_pk-35b2a2c1_ALL-000002_AA.pdb.outCR	0.766	0.77	0.876	0.365	0.913	0.84	0.2	0.667	SimRNA Top1k	ade	SimRNA
11	1y26_rpr_ref.pdb.outCR	c1_tar_ade_pk-35b2a2c1_ALL-000002_AA.pdb.outCR	0.766	0.77	0.876	0.365	0.913	0.84	0.2	0.667	Rosetta+SimRNA	ade	SimRNA+Rosetta
32	1y26_rpr_ref.pdb.outCR	c1_tar_ade_pk-35b2a2c1_ALL-000001_AA.pdb.outCR	0.756	0.763	0.894	0.283	0.913	0.875	0.2	0.4	Evo|Rosetta+SimRNA	ade	SimRNA+Rosetta
29	1y26_rpr_ref.pdb.outCR	c1_tar_ade_pk-35b2a2c1_ALL-000161_AA.pdb.outCR	0.688	0	0.834	0.258	0.87	0.8	0.2	0.333	Evo|SimRNA	ade	SimRNA
15	1y26_rpr_ref.pdb.outCR	c1_tar_ade_pk-35b2a2c1_ALL_thrs7.20A_clust01-000001_AA.pdb.outCR	0.731	0	0.859	0.316	0.913	0.808	0.2	0.5	SimRNA	ade	SimRNA
35	3q3z_rpr_ref.pdb.outCR	c1_tar_min.out.3.pdb.outCR	0.802	0	0.977	0.462	0.955	1	0.385	0.556	Rosetta Top1k	gmp	Rosetta
58	3q3z_rpr_ref.pdb.outCR	c1_tar_min.out.17.pdb.outCR	0.799	0	0.977	0.419	0.955	1	0.308	0.571	Evo|Rosetta	gmp	Rosetta
53	3q3z_rpr_ref.pdb.outCR	c1_tar_c.0.0.pdb.outCR	0.831	0	0.977	0.524	0.955	1	0.385	0.714	Rosetta	gmp	Rosetta
40	3q3z_rpr_ref.pdb.outCR	c1_tar_faa97ed7_ALL-000002_AA.pdb.outCR	0.687	0	0.884	0.334	0.864	0.905	0.308	0.364	SimRNA Top1k	gmp	SimRNA
44	3q3z_rpr_ref.pdb.outCR	c1_tar_faa97ed7_ALL-000002_AA.pdb.outCR	0.687	0	0.884	0.334	0.864	0.905	0.308	0.364	Rosetta+SimRNA	gmp	SimRNA+Rosetta
68	3q3z_rpr_ref.pdb.outCR	c1_tar_faa97ed7_ALL-000009_AA.pdb.outCR	0.667	0	0.836	0.294	0.909	0.769	0.231	0.375	Evo|Rosetta+SimRNA	gmp	SimRNA+Rosetta
64	3q3z_rpr_ref.pdb.outCR	c1_tar_faa97ed7_ALL-000009_AA.pdb.outCR	0.667	0	0.836	0.294	0.909	0.769	0.231	0.375	Evo|SimRNA	gmp	SimRNA
49	3q3z_rpr_ref.pdb.outCR	c1_tar_3q3z+pk2-faa97ed7_ALL_thrs7.70A_clust01-000001_AA.pdb.outCR	0.741	0	0.934	0.314	0.955	0.913	0.231	0.429	SimRNA	gmp	SimRNA
173	target_13_solution_0_renumber_puzzle_ref.pdb.outCR	c1_tar_min.out.1.pdb.outCR	0.784	0	0.973	0.286	0.947	1	0.286	0.286	Rosetta Top1k	rp13	Rosetta
196	target_13_solution_0_renumber_puzzle_ref.pdb.outCR	c1_tar_min.out.1.pdb.outCR	0.784	0	0.973	0.286	0.947	1	0.286	0.286	Evo|Rosetta	rp13	Rosetta
190	target_13_solution_0_renumber_puzzle_ref.pdb.outCR	c1_tar_c.0.0.pdb.outCR	0.716	0	0.923	0.239	0.947	0.9	0.286	0.2	Rosetta	rp13	Rosetta
177	target_13_solution_0_renumber_puzzle_ref.pdb.outCR	c1_tar_20569fa1_ALL-000016_AA.pdb.outCR	0.808	0	0.901	0.507	0.947	0.857	0.429	0.6	SimRNA Top1k	rp13	SimRNA
182	target_13_solution_0_renumber_puzzle_ref.pdb.outCR	c1_tar_20569fa1_ALL-000003_AA.pdb.outCR	0.769	0	0.88	0.378	0.947	0.818	0.286	0.5	Rosetta+SimRNA	rp13	SimRNA+Rosetta
203	target_13_solution_0_renumber_puzzle_ref.pdb.outCR	c1_tar_20569fa1_ALL-000003_AA.pdb.outCR	0.769	0	0.88	0.378	0.947	0.818	0.286	0.5	Evo|Rosetta+SimRNA	rp13	SimRNA+Rosetta
200	target_13_solution_0_renumber_puzzle_ref.pdb.outCR	c1_tar_20569fa1_ALL-000003_AA.pdb.outCR	0.769	0	0.88	0.378	0.947	0.818	0.286	0.5	Evo|SimRNA	rp13	SimRNA
186	target_13_solution_0_renumber_puzzle_ref.pdb.outCR	c1_tar_zmp-pk2-20569fa1_ALL_thrs7.10A_clust01-000001_AA.pdb.outCR	0.784	0	0.901	0.378	0.947	0.857	0.286	0.5	SimRNA	rp13	SimRNA
207	target_rp14_5ddp_bound_clean_noL2_ref.pdb.outCR	c1_tar_min.out.1.pdb.outCR	0.917	0	1	0.756	1	1	0.667	0.857	Rosetta Top1k	rp14	Rosetta
229	target_rp14_5ddp_bound_clean_noL2_ref.pdb.outCR	c1_tar_min.out.1.pdb.outCR	0.917	0	1	0.756	1	1	0.667	0.857	Evo|Rosetta	rp14	Rosetta
224	target_rp14_5ddp_bound_clean_noL2_ref.pdb.outCR	c1_tar_c.0.0.pdb.outCR	0.917	0	1	0.756	1	1	0.667	0.857	Rosetta	rp14	Rosetta
210	target_rp14_5ddp_bound_clean_noL2_ref.pdb.outCR	c1_tar_rp14+m+pk2-946da607_ALL-000009_AA.pdb.outCR	0.873	0	0.968	0.68	0.938	1	0.556	0.833	SimRNA Top1k	rp14	SimRNA
215	target_rp14_5ddp_bound_clean_noL2_ref.pdb.outCR	c1_tar_min.out.1.pdb.outCR	0.917	0	1	0.756	1	1	0.667	0.857	Rosetta+SimRNA	rp14	SimRNA+Rosetta
240	target_rp14_5ddp_bound_clean_noL2_ref.pdb.outCR	c1_tar_min.out.96.pdb.outCR	0.938	0	1	0.816	1	1	0.667	1	Evo|Rosetta+SimRNA	rp14	SimRNA+Rosetta
233	target_rp14_5ddp_bound_clean_noL2_ref.pdb.outCR	c1_tar_rp14+m+pk2-946da607_ALL-000002_AA.pdb.outCR	0.938	0	1	0.816	1	1	0.667	1	Evo|SimRNA	rp14	SimRNA
220	target_rp14_5ddp_bound_clean_noL2_ref.pdb.outCR	c1_tar_rp14+m+pk2-946da607_ALL_thrs6.10A_clust01-000001_AA.pdb.outCR	0.895	0	1	0.68	1	1	0.556	0.833	SimRNA	rp14	SimRNA
243	5k7c_clean_onechain_renumber_as_puzzle_ref.pdb.outCR	c1_tar_min.out.1.pdb.outCR	0.714	0	0.865	0.236	0.889	0.842	0.111	0.5	Rosetta Top1k	rp17	Rosetta
265	5k7c_clean_onechain_renumber_as_puzzle_ref.pdb.outCR	c1_tar_min.out.1.pdb.outCR	0.714	0	0.865	0.236	0.889	0.842	0.111	0.5	Evo|Rosetta	rp17	Rosetta
261	5k7c_clean_onechain_renumber_as_puzzle_ref.pdb.outCR	c1_tar_c.0.0.pdb.outCR	0.698	0	0.865	0.192	0.889	0.842	0.111	0.333	Rosetta	rp17	Rosetta
249	5k7c_clean_onechain_renumber_as_puzzle_ref.pdb.outCR	c1_tar_948f56bb-ea7a-4619-9945-2fbfd6902c24_ALL-000003_AA.pdb.outCR	0.572	0	0.823	0	0.889	0.762	0	0	SimRNA Top1k	rp17	SimRNA
252	5k7c_clean_onechain_renumber_as_puzzle_ref.pdb.outCR	c1_tar_948f56bb-ea7a-4619-9945-2fbfd6902c24_ALL-000323_AA.pdb.outCR	0.63	0	0.811	0	0.833	0.789	0	0	Rosetta+SimRNA	rp17	SimRNA+Rosetta
274	5k7c_clean_onechain_renumber_as_puzzle_ref.pdb.outCR	c1_tar_27b5093d_ALL-000001_AA.pdb.outCR	0.556	0	0.737	0	0.833	0.652	0	0	Evo|Rosetta+SimRNA	rp17	SimRNA+Rosetta
270	5k7c_clean_onechain_renumber_as_puzzle_ref.pdb.outCR	c1_tar_27b5093d_ALL-000001_AA.pdb.outCR	0.556	0	0.737	0	0.833	0.652	0	0	Evo|SimRNA	rp17	SimRNA
257	5k7c_clean_onechain_renumber_as_puzzle_ref.pdb.outCR	c1_tar_rp17+pk2-27b5093d_ALL_thrs6.20A_clust01-000001_AA.pdb.outCR	0.577	0	0.737	0	0.833	0.652	0	0	SimRNA	rp17	SimRNA
72	4lvv_rpr_ref.pdb.outCR	c1_tar_min.out.7.pdb.outCR	0.898	0	1	0.629	1	1	0.462	0.857	Rosetta Top1k	thf	Rosetta
95	4lvv_rpr_ref.pdb.outCR	c1_tar_min.out.1.pdb.outCR	0.833	0	0.964	0.49	0.964	0.964	0.385	0.625	Evo|Rosetta	thf	Rosetta
90	4lvv_rpr_ref.pdb.outCR	c1_tar_c.0.0.pdb.outCR	0.847	0	1	0.462	1	1	0.385	0.556	Rosetta	thf	Rosetta
76	4lvv_rpr_ref.pdb.outCR	c1_tar_7f0f8826_ALL-000001_AA.pdb.outCR	0.723	0	0.902	0.263	0.964	0.844	0.231	0.3	SimRNA Top1k	thf	SimRNA
82	4lvv_rpr_ref.pdb.outCR	c1_tar_7f0f8826_ALL-000001_AA.pdb.outCR	0.723	0	0.902	0.263	0.964	0.844	0.231	0.3	Rosetta+SimRNA	thf	SimRNA+Rosetta
102	4lvv_rpr_ref.pdb.outCR	c1_tar_7f0f8826_ALL-000001_AA.pdb.outCR	0.723	0	0.902	0.263	0.964	0.844	0.231	0.3	Evo|Rosetta+SimRNA	thf	SimRNA+Rosetta
98	4lvv_rpr_ref.pdb.outCR	c1_tar_7f0f8826_ALL-000001_AA.pdb.outCR	0.723	0	0.902	0.263	0.964	0.844	0.231	0.3	Evo|SimRNA	thf	SimRNA
86	4lvv_rpr_ref.pdb.outCR	c1_tar_7f0f8826-thrs8.90A_clust01X.pdb.outCR	0.745	0	0.863	0.419	0.893	0.833	0.308	0.571	SimRNA	thf	SimRNA
107	target_tpp_2gdi_ba_rpr_renumb_chainA_ref.pdb.outCR	c1_tar_min.out.3.pdb.outCR	0.763	0	0.956	0.327	1	0.913	0.25	0.429	Rosetta Top1k	tpp	Rosetta
131	target_tpp_2gdi_ba_rpr_renumb_chainA_ref.pdb.outCR	c1_tar_min.out.2.pdb.outCR	0.763	0	0.977	0.306	1	0.955	0.25	0.375	Evo|Rosetta	tpp	Rosetta
125	target_tpp_2gdi_ba_rpr_renumb_chainA_ref.pdb.outCR	c1_tar_c.0.0.pdb.outCR	0.776	0	0.977	0.327	1	0.955	0.25	0.429	Rosetta	tpp	Rosetta
112	target_tpp_2gdi_ba_rpr_renumb_chainA_ref.pdb.outCR	c1_tar_16662ebf-cf31-42d1-98a3-2aae31f28087_ALL-000002_AA.pdb.outCR	0.679	0	0.884	0.218	0.905	0.864	0.167	0.286	SimRNA Top1k	tpp	SimRNA
117	target_tpp_2gdi_ba_rpr_renumb_chainA_ref.pdb.outCR	c1_tar_16662ebf-cf31-42d1-98a3-2aae31f28087_ALL-000002_AA.pdb.outCR	0.679	0	0.884	0.218	0.905	0.864	0.167	0.286	Rosetta+SimRNA	tpp	SimRNA+Rosetta
136	target_tpp_2gdi_ba_rpr_renumb_chainA_ref.pdb.outCR	c1_tar_16662ebf-cf31-42d1-98a3-2aae31f28087_ALL-000002_AA.pdb.outCR	0.679	0	0.884	0.218	0.905	0.864	0.167	0.286	Evo|Rosetta+SimRNA	tpp	SimRNA+Rosetta
133	target_tpp_2gdi_ba_rpr_renumb_chainA_ref.pdb.outCR	c1_tar_16662ebf-cf31-42d1-98a3-2aae31f28087_ALL-000002_AA.pdb.outCR	0.679	0	0.884	0.218	0.905	0.864	0.167	0.286	Evo|SimRNA	tpp	SimRNA
121	target_tpp_2gdi_ba_rpr_renumb_chainA_ref.pdb.outCR	c1_tar_tpp_16662ebf_ALL_thrs8.00A_clust01-000001_AA.pdb.outCR	0.677	0	0.899	0.118	1	0.808	0.083	0.167	SimRNA	tpp	SimRNA
142	trna_rpr_x_rprA_rpr_rpr_ref.pdb.outCR	c1_tar_min.out.3.pdb.outCR	0.815	0	0.973	0.548	0.947	1	0.5	0.6	Rosetta Top1k	trna	Rosetta
165	trna_rpr_x_rprA_rpr_rpr_ref.pdb.outCR	c1_tar_min.out.5.pdb.outCR	0.775	0	0.973	0.408	0.947	1	0.333	0.5	Evo|Rosetta	trna	Rosetta
159	trna_rpr_x_rprA_rpr_rpr_ref.pdb.outCR	c1_tar_c.0.0.pdb.outCR	0.775	0	0.973	0.408	0.947	1	0.333	0.5	Rosetta	trna	Rosetta
147	trna_rpr_x_rprA_rpr_rpr_ref.pdb.outCR	c1_tar_a9bc516d-e3da-489d-93ef-5eb20e3f13c3_ALL-000001_AA.pdb.outCR	0.754	0	0.919	0.436	0.895	0.944	0.333	0.571	SimRNA Top1k	trna	SimRNA
150	trna_rpr_x_rprA_rpr_rpr_ref.pdb.outCR	c1_tar_a9bc516d-e3da-489d-93ef-5eb20e3f13c3_ALL-000193_AA.pdb.outCR	0.74	0	0.947	0.327	0.947	0.947	0.25	0.429	Rosetta+SimRNA	trna	SimRNA+Rosetta
169	trna_rpr_x_rprA_rpr_rpr_ref.pdb.outCR	c1_tar_min.out.29.pdb.outCR	0.795	0	0.973	0.481	0.947	1	0.417	0.556	Evo|Rosetta+SimRNA	trna	SimRNA+Rosetta
167	trna_rpr_x_rprA_rpr_rpr_ref.pdb.outCR	c5_tar_a9bc516d-e3da-489d-93ef-5eb20e3f13c3_ALL-000001_AA.pdb.outCR	0.754	0	0.919	0.436	0.895	0.944	0.333	0.571	Evo|SimRNA	trna	SimRNA
155	trna_rpr_x_rprA_rpr_rpr_ref.pdb.outCR	c1_tar_a9bc516d-e3da-489d-93ef-5eb20e3f13c3_ALL_thrs7.60A_clust01-000001_AA.pdb.outCR	0.689	0	0.872	0.365	0.895	0.85	0.333	0.4	SimRNA	trna	SimRNA

## Sheet: inf_all_rnas_half
	target	fn	inf_all	inf_stack	inf_WC	inf_nWC	sns_WC	ppv_WC	sns_nWC	ppv_nWC	mode	rna	type
2	1y26_rpr_ref.pdb.outCR	c1_tar_min.out.4.pdb.outCR	0.771	0	0.956	0.258	0.913	1	0.2	0.333	Rosetta Top1k	ade	Rosetta
22	1y26_rpr_ref.pdb.outCR	c1_tar_min.out.10.pdb.outCR	0.79	0	0.934	0.387	0.913	0.955	0.3	0.5	Evo|Rosetta	ade	Rosetta
16	1y26_rpr_ref.pdb.outCR	c1_tar_c.0.0.pdb.outCR	0.743	0	0.894	0.283	0.913	0.875	0.2	0.4	Rosetta	ade	Rosetta
5	1y26_rpr_ref.pdb.outCR	c1_tar_ade_pk-35b2a2c1_ALL-000002_AA.pdb.outCR	0.743	0	0.859	0.365	0.913	0.808	0.2	0.667	SimRNA Top1k	ade	SimRNA
10	1y26_rpr_ref.pdb.outCR	c2_tar_min.out.5.pdb.outCR	0.757	0	0.934	0.258	0.913	0.955	0.2	0.333	Rosetta+SimRNA	ade	SimRNA+Rosetta
31	1y26_rpr_ref.pdb.outCR	c1_tar_ade_pk-35b2a2c1_ALL-000002_AA.pdb.outCR	0.443	0.121	0.876	0.365	0.913	0.84	0.2	0.667	Evo|Rosetta+SimRNA	ade	SimRNA+Rosetta
27	1y26_rpr_ref.pdb.outCR	c1_tar_ade_pk-35b2a2c1_ALL-000161_AA.pdb.outCR	0.688	0	0.834	0.258	0.87	0.8	0.2	0.333	Evo|SimRNA	ade	SimRNA
12	1y26_rpr_ref.pdb.outCR	c1_tar_ade_pk-35b2a2c1_ALL_thrs7.20A_clust01-000001_AA.pdb.outCR	0.731	0	0.859	0.316	0.913	0.808	0.2	0.5	SimRNA	ade	SimRNA
35	3q3z_rpr_ref.pdb.outCR	c1_tar_min.out.3.pdb.outCR	0.802	0	0.977	0.462	0.955	1	0.385	0.556	Rosetta Top1k	gmp	Rosetta
57	3q3z_rpr_ref.pdb.outCR	c1_tar_min.out.16.pdb.outCR	0.833	0	0.955	0.588	0.955	0.955	0.462	0.75	Evo|Rosetta	gmp	Rosetta
53	3q3z_rpr_ref.pdb.outCR	c1_tar_c.0.0.pdb.outCR	0.831	0	0.977	0.524	0.955	1	0.385	0.714	Rosetta	gmp	Rosetta
40	3q3z_rpr_ref.pdb.outCR	c1_tar_faa97ed7_ALL-000002_AA.pdb.outCR	0.687	0	0.884	0.334	0.864	0.905	0.308	0.364	SimRNA Top1k	gmp	SimRNA
44	3q3z_rpr_ref.pdb.outCR	c1_tar_faa97ed7_ALL-000001_AA.pdb.outCR	0.714	0	0.914	0.334	0.955	0.875	0.308	0.364	Rosetta+SimRNA	gmp	SimRNA+Rosetta
67	3q3z_rpr_ref.pdb.outCR	c1_tar_faa97ed7_ALL-000009_AA.pdb.outCR	0.389	0	0.836	0.294	0.909	0.769	0.231	0.375	Evo|Rosetta+SimRNA	gmp	SimRNA+Rosetta
63	3q3z_rpr_ref.pdb.outCR	c1_tar_faa97ed7_ALL-000009_AA.pdb.outCR	0.667	0	0.836	0.294	0.909	0.769	0.231	0.375	Evo|SimRNA	gmp	SimRNA
49	3q3z_rpr_ref.pdb.outCR	c1_tar_3q3z+pk2-faa97ed7_ALL_thrs7.70A_clust01-000001_AA.pdb.outCR	0.741	0	0.934	0.314	0.955	0.913	0.231	0.429	SimRNA	gmp	SimRNA
175	target_13_solution_0_renumber_puzzle_ref.pdb.outCR	c1_tar_min.out.1.pdb.outCR	0.784	0	0.973	0.286	0.947	1	0.286	0.286	Rosetta Top1k	rp13	Rosetta
198	target_13_solution_0_renumber_puzzle_ref.pdb.outCR	c1_tar_min.out.1.pdb.outCR	0.784	0	0.973	0.286	0.947	1	0.286	0.286	Evo|Rosetta	rp13	Rosetta
192	target_13_solution_0_renumber_puzzle_ref.pdb.outCR	c.0.0.pdb.outCR	0.779	0.811	0.923	0.239	0.947	0.9	0.286	0.2	Rosetta	rp13	Rosetta
179	target_13_solution_0_renumber_puzzle_ref.pdb.outCR	c1_tar_20569fa1_ALL-000016_AA.pdb.outCR	0.808	0	0.901	0.507	0.947	0.857	0.429	0.6	SimRNA Top1k	rp13	SimRNA
185	target_13_solution_0_renumber_puzzle_ref.pdb.outCR	c1_tar_20569fa1_ALL-000001_AA.pdb.outCR	0.818	0	0.923	0.436	0.947	0.9	0.286	0.667	Rosetta+SimRNA	rp13	SimRNA+Rosetta
207	target_13_solution_0_renumber_puzzle_ref.pdb.outCR	c1_tar_20569fa1_ALL-000001_AA.pdb.outCR	0.818	0	0.923	0.436	0.947	0.9	0.286	0.667	Evo|Rosetta+SimRNA	rp13	SimRNA+Rosetta
203	target_13_solution_0_renumber_puzzle_ref.pdb.outCR	c1_tar_20569fa1_ALL-000003_AA.pdb.outCR	0.769	0	0.88	0.378	0.947	0.818	0.286	0.5	Evo|SimRNA	rp13	SimRNA
188	target_13_solution_0_renumber_puzzle_ref.pdb.outCR	c1_tar_zmp-pk2-20569fa1_ALL_thrs7.10A_clust01-000001_AA.pdb.outCR	0.784	0	0.901	0.378	0.947	0.857	0.286	0.5	SimRNA	rp13	SimRNA
210	target_rp14_5ddp_bound_clean_noL2_ref.pdb.outCR	c1_tar_min.out.1.pdb.outCR	0.895	0	1	0.68	1	1	0.556	0.833	Rosetta Top1k	rp14	Rosetta
233	target_rp14_5ddp_bound_clean_noL2_ref.pdb.outCR	c1_tar_min.out.1.pdb.outCR	0.519	0	1	0.756	1	1	0.667	0.857	Evo|Rosetta	rp14	Rosetta
227	target_rp14_5ddp_bound_clean_noL2_ref.pdb.outCR	c1_tar_c.0.0.pdb.outCR	0.917	0	1	0.756	1	1	0.667	0.857	Rosetta	rp14	Rosetta
214	target_rp14_5ddp_bound_clean_noL2_ref.pdb.outCR	c1_tar_rp14+m+pk2-946da607_ALL-000009_AA.pdb.outCR	0.873	0	0.968	0.68	0.938	1	0.556	0.833	SimRNA Top1k	rp14	SimRNA
219	target_rp14_5ddp_bound_clean_noL2_ref.pdb.outCR	c1_tar_min.out.1.pdb.outCR	0.917	0	1	0.756	1	1	0.667	0.857	Rosetta+SimRNA	rp14	SimRNA+Rosetta
239	target_rp14_5ddp_bound_clean_noL2_ref.pdb.outCR	c1_tar_min.out.1.pdb.outCR	0.519	0	1	0.756	1	1	0.667	0.857	Evo|Rosetta+SimRNA	rp14	SimRNA+Rosetta
236	target_rp14_5ddp_bound_clean_noL2_ref.pdb.outCR	c1_tar_rp14+m+pk2-946da607_ALL-000045_AA.pdb.outCR	0.494	0	0.935	0.745	0.875	1	0.556	1	Evo|SimRNA	rp14	SimRNA
223	target_rp14_5ddp_bound_clean_noL2_ref.pdb.outCR	c1_tar_rp14+m+pk2-946da607_ALL_thrs6.10A_clust01-000001_AA.pdb.outCR	0.895	0	1	0.68	1	1	0.556	0.833	SimRNA	rp14	SimRNA
243	5k7c_clean_onechain_renumber_as_puzzle_ref.pdb.outCR	c1_tar_min.out.1.pdb.outCR	0.714	0	0.865	0.236	0.889	0.842	0.111	0.5	Rosetta Top1k	rp17	Rosetta
266	5k7c_clean_onechain_renumber_as_puzzle_ref.pdb.outCR	c1_tar_min.out.1.pdb.outCR	0.714	0	0.865	0.236	0.889	0.842	0.111	0.5	Evo|Rosetta	rp17	Rosetta
262	5k7c_clean_onechain_renumber_as_puzzle_ref.pdb.outCR	c1_tar_c.0.0.pdb.outCR	0.698	0	0.865	0.192	0.889	0.842	0.111	0.333	Rosetta	rp17	Rosetta
250	5k7c_clean_onechain_renumber_as_puzzle_ref.pdb.outCR	c1_tar_948f56bb-ea7a-4619-9945-2fbfd6902c24_ALL-000003_AA.pdb.outCR	0.572	0	0.823	0	0.889	0.762	0	0	SimRNA Top1k	rp17	SimRNA
254	5k7c_clean_onechain_renumber_as_puzzle_ref.pdb.outCR	c1_tar_948f56bb-ea7a-4619-9945-2fbfd6902c24_ALL-000136_AA.pdb.outCR	0.572	0	0.843	0	0.889	0.8	0	0	Rosetta+SimRNA	rp17	SimRNA+Rosetta
276	5k7c_clean_onechain_renumber_as_puzzle_ref.pdb.outCR	c1_tar_27b5093d_ALL-000001_AA.pdb.outCR	0.556	0	0.737	0	0.833	0.652	0	0	Evo|Rosetta+SimRNA	rp17	SimRNA+Rosetta
270	5k7c_clean_onechain_renumber_as_puzzle_ref.pdb.outCR	c1_tar_27b5093d_ALL-000001_AA.pdb.outCR	0.556	0	0.737	0	0.833	0.652	0	0	Evo|SimRNA	rp17	SimRNA
258	5k7c_clean_onechain_renumber_as_puzzle_ref.pdb.outCR	c1_tar_rp17+pk2-27b5093d_ALL_thrs6.20A_clust01-000001_AA.pdb.outCR	0.577	0	0.737	0	0.833	0.652	0	0	SimRNA	rp17	SimRNA
71	4lvv_rpr_ref.pdb.outCR	c1_tar_min.out.7.pdb.outCR	0.479	0	0.982	0.566	0.964	1	0.385	0.833	Rosetta Top1k	thf	Rosetta
95	4lvv_rpr_ref.pdb.outCR	c1_tar_min.out.1.pdb.outCR	0.459	0	0.964	0.49	0.964	0.964	0.385	0.625	Evo|Rosetta	thf	Rosetta
90	4lvv_rpr_ref.pdb.outCR	c1_tar_c.0.0.pdb.outCR	0.818	0	0.982	0.392	0.964	1	0.308	0.5	Rosetta	thf	Rosetta
76	4lvv_rpr_ref.pdb.outCR	c1_tar_7f0f8826_ALL-000001_AA.pdb.outCR	0.723	0	0.902	0.263	0.964	0.844	0.231	0.3	SimRNA Top1k	thf	SimRNA
83	4lvv_rpr_ref.pdb.outCR	c1_tar_7f0f8826_ALL-000001_AA.pdb.outCR	0.723	0	0.902	0.263	0.964	0.844	0.231	0.3	Rosetta+SimRNA	thf	SimRNA+Rosetta
101	4lvv_rpr_ref.pdb.outCR	c1_tar_7f0f8826_ALL-000001_AA.pdb.outCR	0.723	0	0.902	0.263	0.964	0.844	0.231	0.3	Evo|Rosetta+SimRNA	thf	SimRNA+Rosetta
98	4lvv_rpr_ref.pdb.outCR	c1_tar_7f0f8826_ALL-000001_AA.pdb.outCR	0.723	0	0.902	0.263	0.964	0.844	0.231	0.3	Evo|SimRNA	thf	SimRNA
86	4lvv_rpr_ref.pdb.outCR	c1_tar_7f0f8826-thrs8.90A_clust01X.pdb.outCR	0.745	0	0.863	0.419	0.893	0.833	0.308	0.571	SimRNA	thf	SimRNA
104	target_tpp_2gdi_ba_rpr_renumb_chainA_ref.pdb.outCR	c1_tar_min.out.3.pdb.outCR	0.763	0	0.956	0.327	1	0.913	0.25	0.429	Rosetta Top1k	tpp	Rosetta
126	target_tpp_2gdi_ba_rpr_renumb_chainA_ref.pdb.outCR	c1_tar_min.out.2.pdb.outCR	0.763	0	0.977	0.306	1	0.955	0.25	0.375	Evo|Rosetta	tpp	Rosetta
122	target_tpp_2gdi_ba_rpr_renumb_chainA_ref.pdb.outCR	c1_tar_c.0.0.pdb.outCR	0.776	0	0.977	0.327	1	0.955	0.25	0.429	Rosetta	tpp	Rosetta
109	target_tpp_2gdi_ba_rpr_renumb_chainA_ref.pdb.outCR	c1_tar_16662ebf-cf31-42d1-98a3-2aae31f28087_ALL-000002_AA.pdb.outCR	0.679	0	0.884	0.218	0.905	0.864	0.167	0.286	SimRNA Top1k	tpp	SimRNA
114	target_tpp_2gdi_ba_rpr_renumb_chainA_ref.pdb.outCR	c1_tar_16662ebf-cf31-42d1-98a3-2aae31f28087_ALL-000002_AA.pdb.outCR	0.679	0	0.884	0.218	0.905	0.864	0.167	0.286	Rosetta+SimRNA	tpp	SimRNA+Rosetta
134	target_tpp_2gdi_ba_rpr_renumb_chainA_ref.pdb.outCR	c1_tar_16662ebf-cf31-42d1-98a3-2aae31f28087_ALL-000002_AA.pdb.outCR	0.679	0	0.884	0.218	0.905	0.864	0.167	0.286	Evo|Rosetta+SimRNA	tpp	SimRNA+Rosetta
131	target_tpp_2gdi_ba_rpr_renumb_chainA_ref.pdb.outCR	c1_tar_16662ebf-cf31-42d1-98a3-2aae31f28087_ALL-000002_AA.pdb.outCR	0.679	0	0.884	0.218	0.905	0.864	0.167	0.286	Evo|SimRNA	tpp	SimRNA
118	target_tpp_2gdi_ba_rpr_renumb_chainA_ref.pdb.outCR	c1_tar_tpp_16662ebf_ALL_thrs8.00A_clust01-000001_AA.pdb.outCR	0.677	0	0.899	0.118	1	0.808	0.083	0.167	SimRNA	tpp	SimRNA
139	trna_rpr_x_rprA_rpr_rpr_ref.pdb.outCR	c1_tar_min.out.3.pdb.outCR	0.815	0	0.973	0.548	0.947	1	0.5	0.6	Rosetta Top1k	trna	Rosetta
162	trna_rpr_x_rprA_rpr_rpr_ref.pdb.outCR	c1_tar_min.out.3.pdb.outCR	0.815	0	0.973	0.548	0.947	1	0.5	0.6	Evo|Rosetta	trna	Rosetta
157	trna_rpr_x_rprA_rpr_rpr_ref.pdb.outCR	c1_tar_c.0.0.pdb.outCR	0.775	0	0.973	0.408	0.947	1	0.333	0.5	Rosetta	trna	Rosetta
145	trna_rpr_x_rprA_rpr_rpr_ref.pdb.outCR	c1_tar_a9bc516d-e3da-489d-93ef-5eb20e3f13c3_ALL-000001_AA.pdb.outCR	0.754	0	0.919	0.436	0.895	0.944	0.333	0.571	SimRNA Top1k	trna	SimRNA
150	trna_rpr_x_rprA_rpr_rpr_ref.pdb.outCR	c1_tar_a9bc516d-e3da-489d-93ef-5eb20e3f13c3_ALL-000001_AA.pdb.outCR	0.754	0	0.919	0.436	0.895	0.944	0.333	0.571	Rosetta+SimRNA	trna	SimRNA+Rosetta
169	trna_rpr_x_rprA_rpr_rpr_ref.pdb.outCR	c1_tar_a9bc516d-e3da-489d-93ef-5eb20e3f13c3_ALL-000004_AA.pdb.outCR	0.721	0	0.947	0.348	0.947	0.947	0.333	0.364	Evo|Rosetta+SimRNA	trna	SimRNA+Rosetta
165	trna_rpr_x_rprA_rpr_rpr_ref.pdb.outCR	c1_tar_trnapk-19c17b6c_ALL_top200-000034_AA.pdb.outCR	0.396	0	0.851	0.433	0.895	0.81	0.25	0.75	Evo|SimRNA	trna	SimRNA
153	trna_rpr_x_rprA_rpr_rpr_ref.pdb.outCR	c1_tar_a9bc516d-e3da-489d-93ef-5eb20e3f13c3_ALL_thrs7.60A_clust01-000001_AA.pdb.outCR	0.689	0	0.872	0.365	0.895	0.85	0.333	0.4	SimRNA	trna	SimRNA

## Sheet: rmsd_all_rnas_1of6
	fn	rmsd_all	mode	rna	type
0	c1_tar_min.out.10.pdb	12.98	Rosetta Top1k	ade	Rosetta
23	c1_tar_min.out.10.pdb	12.98	Evo|Rosetta	ade	Rosetta
19	c1_tar_c.0.0.pdb	9.02	Rosetta	ade	Rosetta
5	c1_tar_ade_pk-35b2a2c1_ALL-000002_AA.pdb	7.24	SimRNA Top1k	ade	SimRNA
10	c1_tar_ade_pk-35b2a2c1_ALL-000002_AA.pdb	7.24	Rosetta+SimRNA	ade	SimRNA+Rosetta
31	c1_tar_ade_pk-35b2a2c1_ALL-000001_AA.pdb	8.48	Evo|Rosetta+SimRNA	ade	SimRNA+Rosetta
28	c1_tar_ade_pk-35b2a2c1_ALL-000161_AA.pdb	9.99	Evo|SimRNA	ade	SimRNA
15	c1_tar_ade_pk-35b2a2c1_ALL_thrs7.20A_clust01-000001_AA.pdb	6.98	SimRNA	ade	SimRNA
34	c1_tar_min.out.3.pdb	9.85	Rosetta Top1k	gmp	Rosetta
57	c1_tar_min.out.17.pdb	14.98	Evo|Rosetta	gmp	Rosetta
53	c1_tar_c.0.0.pdb	11	Rosetta	gmp	Rosetta
39	c1_tar_faa97ed7_ALL-000002_AA.pdb	12.37	SimRNA Top1k	gmp	SimRNA
44	c1_tar_faa97ed7_ALL-000002_AA.pdb	12.37	Rosetta+SimRNA	gmp	SimRNA+Rosetta
66	c1_tar_faa97ed7_ALL-000009_AA.pdb	9.64	Evo|Rosetta+SimRNA	gmp	SimRNA+Rosetta
62	c1_tar_faa97ed7_ALL-000009_AA.pdb	9.64	Evo|SimRNA	gmp	SimRNA
49	c1_tar_3q3z+pk2-faa97ed7_ALL_thrs7.70A_clust01-000001_AA.pdb	12.09	SimRNA	gmp	SimRNA
171	c1_tar_min.out.1.pdb	6.34	Rosetta Top1k	rp13	Rosetta
194	c1_tar_min.out.1.pdb	6.34	Evo|Rosetta	rp13	Rosetta
190	c1_tar_c.0.0.pdb	9.96	Rosetta	rp13	Rosetta
176	c1_tar_20569fa1_ALL-000016_AA.pdb	9.46	SimRNA Top1k	rp13	SimRNA
181	c1_tar_20569fa1_ALL-000003_AA.pdb	8.26	Rosetta+SimRNA	rp13	SimRNA+Rosetta
202	c1_tar_20569fa1_ALL-000003_AA.pdb	8.26	Evo|Rosetta+SimRNA	rp13	SimRNA+Rosetta
198	c1_tar_20569fa1_ALL-000003_AA.pdb	8.26	Evo|SimRNA	rp13	SimRNA
186	c1_tar_zmp-pk2-20569fa1_ALL_thrs7.10A_clust01-000001_AA.pdb	8.36	SimRNA	rp13	SimRNA
205	c1_tar_min.out.1.pdb	5.31	Rosetta Top1k	rp14	Rosetta
228	c1_tar_min.out.1.pdb	5.31	Evo|Rosetta	rp14	Rosetta
224	c1_tar_c.0.0.pdb	5.76	Rosetta	rp14	Rosetta
210	c1_tar_rp14+m+pk2-946da607_ALL-000009_AA.pdb	9.05	SimRNA Top1k	rp14	SimRNA
215	c1_tar_min.out.1.pdb	5.31	Rosetta+SimRNA	rp14	SimRNA+Rosetta
238	c1_tar_min.out.96.pdb	5.28	Evo|Rosetta+SimRNA	rp14	SimRNA+Rosetta
233	c1_tar_rp14+m+pk2-946da607_ALL-000002_AA.pdb	6.33	Evo|SimRNA	rp14	SimRNA
220	c1_tar_rp14+m+pk2-946da607_ALL_thrs6.10A_clust01-000001_AA.pdb	6.29	SimRNA	rp14	SimRNA
242	c1_tar_min.out.1.pdb	13.63	Rosetta Top1k	rp17	Rosetta
265	c1_tar_min.out.1.pdb	13.63	Evo|Rosetta	rp17	Rosetta
261	c1_tar_c.0.0.pdb	14.18	Rosetta	rp17	Rosetta
247	c1_tar_948f56bb-ea7a-4619-9945-2fbfd6902c24_ALL-000003_AA.pdb	8.99	SimRNA Top1k	rp17	SimRNA
252	c1_tar_948f56bb-ea7a-4619-9945-2fbfd6902c24_ALL-000323_AA.pdb	13.02	Rosetta+SimRNA	rp17	SimRNA+Rosetta
272	c1_tar_27b5093d_ALL-000001_AA.pdb	15.94	Evo|Rosetta+SimRNA	rp17	SimRNA+Rosetta
269	c1_tar_27b5093d_ALL-000001_AA.pdb	15.94	Evo|SimRNA	rp17	SimRNA
257	c1_tar_rp17+pk2-27b5093d_ALL_thrs6.20A_clust01-000001_AA.pdb	15.72	SimRNA	rp17	SimRNA
71	c1_tar_min.out.7.pdb	5.01	Rosetta Top1k	thf	Rosetta
94	c1_tar_min.out.1.pdb	5.05	Evo|Rosetta	thf	Rosetta
90	c1_tar_c.0.0.pdb	5.07	Rosetta	thf	Rosetta
76	c1_tar_7f0f8826_ALL-000001_AA.pdb	10.5	SimRNA Top1k	thf	SimRNA
81	c1_tar_7f0f8826_ALL-000001_AA.pdb	10.5	Rosetta+SimRNA	thf	SimRNA+Rosetta
101	c1_tar_7f0f8826_ALL-000001_AA.pdb	10.5	Evo|Rosetta+SimRNA	thf	SimRNA+Rosetta
98	c1_tar_7f0f8826_ALL-000001_AA.pdb	10.5	Evo|SimRNA	thf	SimRNA
86	c1_tar_7f0f8826-thrs8.90A_clust01X.pdb	11.4	SimRNA	thf	SimRNA
106	c1_tar_min.out.3.pdb	18.04	Rosetta Top1k	tpp	Rosetta
129	c1_tar_min.out.2.pdb	15.75	Evo|Rosetta	tpp	Rosetta
125	c1_tar_c.0.0.pdb	19.39	Rosetta	tpp	Rosetta
111	c1_tar_16662ebf-cf31-42d1-98a3-2aae31f28087_ALL-000002_AA.pdb	24.84	SimRNA Top1k	tpp	SimRNA
116	c1_tar_16662ebf-cf31-42d1-98a3-2aae31f28087_ALL-000002_AA.pdb	24.84	Rosetta+SimRNA	tpp	SimRNA+Rosetta
135	c1_tar_16662ebf-cf31-42d1-98a3-2aae31f28087_ALL-000002_AA.pdb	24.84	Evo|Rosetta+SimRNA	tpp	SimRNA+Rosetta
133	c1_tar_16662ebf-cf31-42d1-98a3-2aae31f28087_ALL-000002_AA.pdb	24.84	Evo|SimRNA	tpp	SimRNA
121	c1_tar_tpp_16662ebf_ALL_thrs8.00A_clust01-000001_AA.pdb	22.62	SimRNA	tpp	SimRNA
140	c1_tar_min.out.3.pdb	14.75	Rosetta Top1k	trna	Rosetta
163	c1_tar_min.out.5.pdb	13.43	Evo|Rosetta	trna	Rosetta
159	c1_tar_c.0.0.pdb	13.55	Rosetta	trna	Rosetta
145	c1_tar_a9bc516d-e3da-489d-93ef-5eb20e3f13c3_ALL-000001_AA.pdb	15.68	SimRNA Top1k	trna	SimRNA
150	c1_tar_a9bc516d-e3da-489d-93ef-5eb20e3f13c3_ALL-000193_AA.pdb	13.39	Rosetta+SimRNA	trna	SimRNA+Rosetta
168	c1_tar_min.out.29.pdb	12.53	Evo|Rosetta+SimRNA	trna	SimRNA+Rosetta
167	c5_tar_a9bc516d-e3da-489d-93ef-5eb20e3f13c3_ALL-000001_AA.pdb	15.68	Evo|SimRNA	trna	SimRNA
155	c1_tar_a9bc516d-e3da-489d-93ef-5eb20e3f13c3_ALL_thrs7.60A_clust01-000001_AA.pdb	14.43	SimRNA	trna	SimRNA

## Sheet: rmsd_all_rnas_half
	fn	rmsd_all	mode	rna	type
0	c1_tar_min.out.4.pdb	11.73	Rosetta Top1k	ade	Rosetta
20	c1_tar_min.out.10.pdb	12.98	Evo|Rosetta	ade	Rosetta
16	c1_tar_c.0.0.pdb	9.02	Rosetta	ade	Rosetta
5	c1_tar_ade_pk-35b2a2c1_ALL-000002_AA.pdb	7.24	SimRNA Top1k	ade	SimRNA
10	c2_tar_min.out.5.pdb	8.6	Rosetta+SimRNA	ade	SimRNA+Rosetta
29	c1_tar_ade_pk-35b2a2c1_ALL-000002_AA.pdb	7.24	Evo|Rosetta+SimRNA	ade	SimRNA+Rosetta
25	c1_tar_ade_pk-35b2a2c1_ALL-000161_AA.pdb	9.99	Evo|SimRNA	ade	SimRNA
12	c1_tar_ade_pk-35b2a2c1_ALL_thrs7.20A_clust01-000001_AA.pdb	6.98	SimRNA	ade	SimRNA
34	c1_tar_min.out.3.pdb	9.85	Rosetta Top1k	gmp	Rosetta
57	c1_tar_min.out.16.pdb	13.7	Evo|Rosetta	gmp	Rosetta
53	c1_tar_c.0.0.pdb	11	Rosetta	gmp	Rosetta
39	c1_tar_faa97ed7_ALL-000002_AA.pdb	12.37	SimRNA Top1k	gmp	SimRNA
44	c1_tar_faa97ed7_ALL-000001_AA.pdb	12.59	Rosetta+SimRNA	gmp	SimRNA+Rosetta
66	c1_tar_faa97ed7_ALL-000009_AA.pdb	9.64	Evo|Rosetta+SimRNA	gmp	SimRNA+Rosetta
62	c1_tar_faa97ed7_ALL-000009_AA.pdb	9.64	Evo|SimRNA	gmp	SimRNA
49	c1_tar_3q3z+pk2-faa97ed7_ALL_thrs7.70A_clust01-000001_AA.pdb	12.09	SimRNA	gmp	SimRNA
173	c1_tar_min.out.1.pdb	6.34	Rosetta Top1k	rp13	Rosetta
196	c1_tar_min.out.1.pdb	6.34	Evo|Rosetta	rp13	Rosetta
192	c.0.0.pdb	9.96	Rosetta	rp13	Rosetta
178	c1_tar_20569fa1_ALL-000016_AA.pdb	9.46	SimRNA Top1k	rp13	SimRNA
183	c1_tar_20569fa1_ALL-000001_AA.pdb	10.52	Rosetta+SimRNA	rp13	SimRNA+Rosetta
205	c1_tar_20569fa1_ALL-000001_AA.pdb	10.52	Evo|Rosetta+SimRNA	rp13	SimRNA+Rosetta
201	c1_tar_20569fa1_ALL-000003_AA.pdb	8.26	Evo|SimRNA	rp13	SimRNA
188	c1_tar_zmp-pk2-20569fa1_ALL_thrs7.10A_clust01-000001_AA.pdb	8.36	SimRNA	rp13	SimRNA
208	c1_tar_min.out.1.pdb	5.31	Rosetta Top1k	rp14	Rosetta
231	c1_tar_min.out.1.pdb	5.31	Evo|Rosetta	rp14	Rosetta
227	c1_tar_c.0.0.pdb	5.76	Rosetta	rp14	Rosetta
213	c1_tar_rp14+m+pk2-946da607_ALL-000009_AA.pdb	9.05	SimRNA Top1k	rp14	SimRNA
218	c1_tar_min.out.1.pdb	5.31	Rosetta+SimRNA	rp14	SimRNA+Rosetta
239	c1_tar_min.out.1.pdb	5.31	Evo|Rosetta+SimRNA	rp14	SimRNA+Rosetta
235	c1_tar_rp14+m+pk2-946da607_ALL-000045_AA.pdb	8.87	Evo|SimRNA	rp14	SimRNA
223	c1_tar_rp14+m+pk2-946da607_ALL_thrs6.10A_clust01-000001_AA.pdb	6.29	SimRNA	rp14	SimRNA
243	c1_tar_min.out.1.pdb	13.63	Rosetta Top1k	rp17	Rosetta
266	c1_tar_min.out.1.pdb	13.63	Evo|Rosetta	rp17	Rosetta
262	c1_tar_c.0.0.pdb	14.18	Rosetta	rp17	Rosetta
248	c1_tar_948f56bb-ea7a-4619-9945-2fbfd6902c24_ALL-000003_AA.pdb	8.99	SimRNA Top1k	rp17	SimRNA
253	c1_tar_948f56bb-ea7a-4619-9945-2fbfd6902c24_ALL-000136_AA.pdb	13.7	Rosetta+SimRNA	rp17	SimRNA+Rosetta
274	c1_tar_27b5093d_ALL-000001_AA.pdb	15.94	Evo|Rosetta+SimRNA	rp17	SimRNA+Rosetta
270	c1_tar_27b5093d_ALL-000001_AA.pdb	15.94	Evo|SimRNA	rp17	SimRNA
258	c1_tar_rp17+pk2-27b5093d_ALL_thrs6.20A_clust01-000001_AA.pdb	15.72	SimRNA	rp17	SimRNA
71	c1_tar_min.out.7.pdb	5.01	Rosetta Top1k	thf	Rosetta
94	c1_tar_min.out.1.pdb	5.05	Evo|Rosetta	thf	Rosetta
90	c1_tar_c.0.0.pdb	5.07	Rosetta	thf	Rosetta
76	c1_tar_7f0f8826_ALL-000001_AA.pdb	10.5	SimRNA Top1k	thf	SimRNA
81	c1_tar_7f0f8826_ALL-000001_AA.pdb	10.5	Rosetta+SimRNA	thf	SimRNA+Rosetta
100	c1_tar_7f0f8826_ALL-000001_AA.pdb	10.5	Evo|Rosetta+SimRNA	thf	SimRNA+Rosetta
97	c1_tar_7f0f8826_ALL-000001_AA.pdb	10.5	Evo|SimRNA	thf	SimRNA
86	c1_tar_7f0f8826-thrs8.90A_clust01X.pdb	11.4	SimRNA	thf	SimRNA
103	c1_tar_min.out.3.pdb	18.04	Rosetta Top1k	tpp	Rosetta
126	c1_tar_min.out.2.pdb	15.75	Evo|Rosetta	tpp	Rosetta
122	c1_tar_c.0.0.pdb	19.39	Rosetta	tpp	Rosetta
108	c1_tar_16662ebf-cf31-42d1-98a3-2aae31f28087_ALL-000002_AA.pdb	24.84	SimRNA Top1k	tpp	SimRNA
113	c1_tar_16662ebf-cf31-42d1-98a3-2aae31f28087_ALL-000002_AA.pdb	24.84	Rosetta+SimRNA	tpp	SimRNA+Rosetta
133	c1_tar_16662ebf-cf31-42d1-98a3-2aae31f28087_ALL-000002_AA.pdb	24.84	Evo|Rosetta+SimRNA	tpp	SimRNA+Rosetta
131	c1_tar_16662ebf-cf31-42d1-98a3-2aae31f28087_ALL-000002_AA.pdb	24.84	Evo|SimRNA	tpp	SimRNA
118	c1_tar_tpp_16662ebf_ALL_thrs8.00A_clust01-000001_AA.pdb	22.62	SimRNA	tpp	SimRNA
138	c1_tar_min.out.3.pdb	14.75	Rosetta Top1k	trna	Rosetta
161	c1_tar_min.out.3.pdb	14.75	Evo|Rosetta	trna	Rosetta
157	c1_tar_c.0.0.pdb	13.55	Rosetta	trna	Rosetta
143	c1_tar_a9bc516d-e3da-489d-93ef-5eb20e3f13c3_ALL-000001_AA.pdb	15.68	SimRNA Top1k	trna	SimRNA
148	c1_tar_a9bc516d-e3da-489d-93ef-5eb20e3f13c3_ALL-000001_AA.pdb	15.68	Rosetta+SimRNA	trna	SimRNA+Rosetta
168	c1_tar_a9bc516d-e3da-489d-93ef-5eb20e3f13c3_ALL-000004_AA.pdb	12.65	Evo|Rosetta+SimRNA	trna	SimRNA+Rosetta
165	c1_tar_trnapk-19c17b6c_ALL_top200-000034_AA.pdb	10.29	Evo|SimRNA	trna	SimRNA
153	c1_tar_a9bc516d-e3da-489d-93ef-5eb20e3f13c3_ALL_thrs7.60A_clust01-000001_AA.pdb	14.43	SimRNA	trna	SimRNA

## Sheet: rmsd_core_rnas_half
	index	target	fn	rmsd_motif	group_name	mode	rna	type
0	0	1y26_rpr_ref.pdb	c1_tar_min.out.4.pdb	11.36		Rosetta Top1k	ade	Rosetta
20	0	1y26_rpr_ref.pdb	c1_tar_min.out.10.pdb	11.68		Evo|Rosetta	ade	Rosetta
16	0	1y26_rpr_ref.pdb	c1_tar_c.0.0.pdb	7.32		Rosetta	ade	Rosetta
5	0	1y26_rpr_ref.pdb	c1_tar_ade_pk-35b2a2c1_ALL-000002_AA.pdb	5.78		SimRNA Top1k	ade	SimRNA
10	0	1y26_rpr_ref.pdb	c2_tar_min.out.5.pdb	6.73		Rosetta+SimRNA	ade	SimRNA+Rosetta
30	0	1y26_rpr_ref.pdb	c1_tar_ade_pk-35b2a2c1_ALL-000002_AA.pdb	5.63		Evo|Rosetta+SimRNA	ade	SimRNA+Rosetta
25	0	1y26_rpr_ref.pdb	c1_tar_ade_pk-35b2a2c1_ALL-000161_AA.pdb	9.55		Evo|SimRNA	ade	SimRNA
12	0	1y26_rpr_ref.pdb	c1_tar_ade_pk-35b2a2c1_ALL_thrs7.20A_clust01-000001_AA.pdb	5.09		SimRNA	ade	SimRNA
35	0	3q3z_rpr_ref.pdb	c1_tar_min.out.3.pdb	10.18		Rosetta Top1k	gmp	Rosetta
58	0	3q3z_rpr_ref.pdb	c1_gxx_min.out.9.pdb	15.85		Evo|Rosetta	gmp	Rosetta
54	0	3q3z_rpr_ref.pdb	c1_tar_c.0.0.pdb	11.41		Rosetta	gmp	Rosetta
40	0	3q3z_rpr_ref.pdb	c1_tar_faa97ed7_ALL-000002_AA.pdb	12.72		SimRNA Top1k	gmp	SimRNA
45	0	3q3z_rpr_ref.pdb	c1_tar_faa97ed7_ALL-000001_AA.pdb	13.09		Rosetta+SimRNA	gmp	SimRNA+Rosetta
68	0	3q3z_rpr_ref.pdb	c1_gxx_6bd26658_ALL-000002_AA.pdb	8.76		Evo|Rosetta+SimRNA	gmp	SimRNA+Rosetta
63	0	3q3z_rpr_ref.pdb	c1_gxx_6bd26658_ALL-000001_AA.pdb	9.65		Evo|SimRNA	gmp	SimRNA
50	0	3q3z_rpr_ref.pdb	c1_tar_3q3z+pk2-faa97ed7_ALL_thrs7.70A_clust01-000001_AA.pdb	12.26		SimRNA	gmp	SimRNA
190	0	target_13_solution_0_renumber_puzzle_ref.pdb	c1_tar_min.out.1.pdb	4.41		Rosetta Top1k	rp13	Rosetta
213	0	target_13_solution_0_renumber_puzzle_ref.pdb	c1_tar_min.out.1.pdb	4.41		Evo|Rosetta	rp13	Rosetta
209	0	target_13_solution_0_renumber_puzzle_ref.pdb	c1_tar_c.0.0.pdb	8.32		Rosetta	rp13	Rosetta
195	0	target_13_solution_0_renumber_puzzle_ref.pdb	c1_tar_20569fa1_ALL-000016_AA.pdb	7.69		SimRNA Top1k	rp13	SimRNA
200	0	target_13_solution_0_renumber_puzzle_ref.pdb	c1_tar_20569fa1_ALL-000001_AA.pdb	10.2		Rosetta+SimRNA	rp13	SimRNA+Rosetta
223	0	target_13_solution_0_renumber_puzzle_ref.pdb	c1_tar_20569fa1_ALL-000001_AA.pdb	10.2		Evo|Rosetta+SimRNA	rp13	SimRNA+Rosetta
218	0	target_13_solution_0_renumber_puzzle_ref.pdb	c1_tar_20569fa1_ALL-000003_AA.pdb	6.73		Evo|SimRNA	rp13	SimRNA
205	0	target_13_solution_0_renumber_puzzle_ref.pdb	c1_tar_zmp-pk2-20569fa1_ALL_thrs7.10A_clust01-000001_AA.pdb	6.42		SimRNA	rp13	SimRNA
228	0	target_rp14_5ddp_bound_clean_noL2_ref.pdb	c1_tar_min.out.1.pdb	4.83		Rosetta Top1k	rp14	Rosetta
251	0	target_rp14_5ddp_bound_clean_noL2_ref.pdb	c1_tar_min.out.1.pdb	4.83		Evo|Rosetta	rp14	Rosetta
247	0	target_rp14_5ddp_bound_clean_noL2_ref.pdb	c1_tar_c.0.0.pdb	4.52		Rosetta	rp14	Rosetta
233	0	target_rp14_5ddp_bound_clean_noL2_ref.pdb	c1_tar_rp14+m+pk2-946da607_ALL-000009_AA.pdb	7.13		SimRNA Top1k	rp14	SimRNA
238	0	target_rp14_5ddp_bound_clean_noL2_ref.pdb	c1_tar_min.out.1.pdb	4.83		Rosetta+SimRNA	rp14	SimRNA+Rosetta
261	0	target_rp14_5ddp_bound_clean_noL2_ref.pdb	c1_tar_min.out.1.pdb	4.83		Evo|Rosetta+SimRNA	rp14	SimRNA+Rosetta
256	0	target_rp14_5ddp_bound_clean_noL2_ref.pdb	c1_tar_rp14+m+pk2-946da607_ALL-000045_AA.pdb	7.45		Evo|SimRNA	rp14	SimRNA
243	0	target_rp14_5ddp_bound_clean_noL2_ref.pdb	c1_tar_rp14+m+pk2-946da607_ALL_thrs6.10A_clust01-000001_AA.pdb	4.71		SimRNA	rp14	SimRNA
266	0	5k7c_clean_onechain_renumber_as_puzzle_ref.pdb	c1_tar_min.out.1.pdb	13.37		Rosetta Top1k	rp17	Rosetta
289	0	5k7c_clean_onechain_renumber_as_puzzle_ref.pdb	c1_tar_min.out.1.pdb	13.37		Evo|Rosetta	rp17	Rosetta
285	0	5k7c_clean_onechain_renumber_as_puzzle_ref.pdb	c1_tar_c.0.0.pdb	11.74		Rosetta	rp17	Rosetta
271	0	5k7c_clean_onechain_renumber_as_puzzle_ref.pdb	c1_tar_948f56bb-ea7a-4619-9945-2fbfd6902c24_ALL-000003_AA.pdb	8.75		SimRNA Top1k	rp17	SimRNA
276	0	5k7c_clean_onechain_renumber_as_puzzle_ref.pdb	c1_tar_948f56bb-ea7a-4619-9945-2fbfd6902c24_ALL-000136_AA.pdb	13.31		Rosetta+SimRNA	rp17	SimRNA+Rosetta
299	0	5k7c_clean_onechain_renumber_as_puzzle_ref.pdb	c1_tar_27b5093d_ALL-000001_AA.pdb	16.64		Evo|Rosetta+SimRNA	rp17	SimRNA+Rosetta
294	0	5k7c_clean_onechain_renumber_as_puzzle_ref.pdb	c1_tar_27b5093d_ALL-000001_AA.pdb	13.6		Evo|SimRNA	rp17	SimRNA
281	0	5k7c_clean_onechain_renumber_as_puzzle_ref.pdb	c1_tar_rp17+pk2-27b5093d_ALL_thrs6.20A_clust01-000001_AA.pdb	16.72		SimRNA	rp17	SimRNA
73	0	4lvv_rpr_ref.pdb	c1_tar_min.out.7.pdb	4.79		Rosetta Top1k	thf	Rosetta
96	0	4lvv_rpr_ref.pdb	c1_tha_min.out.1.pdb	6.54		Evo|Rosetta	thf	Rosetta
92	0	4lvv_rpr_ref.pdb	c1_tar_c.0.0.pdb	4.59		Rosetta	thf	Rosetta
78	0	4lvv_rpr_ref.pdb	c1_tar_7f0f8826_ALL-000001_AA.pdb	11.11		SimRNA Top1k	thf	SimRNA
83	0	4lvv_rpr_ref.pdb	c1_tar_7f0f8826_ALL-000001_AA.pdb	11.11		Rosetta+SimRNA	thf	SimRNA+Rosetta
106	0	4lvv_rpr_ref.pdb	c1_tha_5f8916a8_ALL-000001_AA.pdb	11.52		Evo|Rosetta+SimRNA	thf	SimRNA+Rosetta
101	0	4lvv_rpr_ref.pdb	c1_tha_5f8916a8_ALL-000001_AA.pdb	11.52		Evo|SimRNA	thf	SimRNA
88	0	4lvv_rpr_ref.pdb	c1_tar_7f0f8826-thrs8.90A_clust01X.pdb	11.87		SimRNA	thf	SimRNA
111	0	target_tpp_2gdi_ba_rpr_renumb_chainA_ref.pdb	c1_tar_min.out.3.pdb	17.09		Rosetta Top1k	tpp	Rosetta
134	0	target_tpp_2gdi_ba_rpr_renumb_chainA_ref.pdb	c1_tar_min.out.2.pdb	13.92		Evo|Rosetta	tpp	Rosetta
130	0	target_tpp_2gdi_ba_rpr_renumb_chainA_ref.pdb	c1_tar_c.0.0.pdb	17.55		Rosetta	tpp	Rosetta
116	0	target_tpp_2gdi_ba_rpr_renumb_chainA_ref.pdb	c1_tar_16662ebf-cf31-42d1-98a3-2aae31f28087_ALL-000002_AA.pdb	24.08		SimRNA Top1k	tpp	SimRNA
121	0	target_tpp_2gdi_ba_rpr_renumb_chainA_ref.pdb	c1_tar_16662ebf-cf31-42d1-98a3-2aae31f28087_ALL-000002_AA.pdb	24.08		Rosetta+SimRNA	tpp	SimRNA+Rosetta
144	0	target_tpp_2gdi_ba_rpr_renumb_chainA_ref.pdb	c1_tar_16662ebf-cf31-42d1-98a3-2aae31f28087_ALL-000002_AA.pdb	24.08		Evo|Rosetta+SimRNA	tpp	SimRNA+Rosetta
139	0	target_tpp_2gdi_ba_rpr_renumb_chainA_ref.pdb	c1_tar_16662ebf-cf31-42d1-98a3-2aae31f28087_ALL-000002_AA.pdb	24.08		Evo|SimRNA	tpp	SimRNA
126	0	target_tpp_2gdi_ba_rpr_renumb_chainA_ref.pdb	c1_tar_tpp_16662ebf_ALL_thrs8.00A_clust01-000001_AA.pdb	22.37		SimRNA	tpp	SimRNA
149	0	trna_rpr_x_rprA_rpr_rpr_ref.pdb	c1_tar_min.out.3.pdb	14.6		Rosetta Top1k	trna	Rosetta
172	0	trna_rpr_x_rprA_rpr_rpr_ref.pdb	c1_tar_min.out.3.pdb	14.6		Evo|Rosetta	trna	Rosetta
168	0	trna_rpr_x_rprA_rpr_rpr_ref.pdb	c1_tar_c.0.0.pdb	13.11		Rosetta	trna	Rosetta
154	0	trna_rpr_x_rprA_rpr_rpr_ref.pdb	c1_tar_a9bc516d-e3da-489d-93ef-5eb20e3f13c3_ALL-000001_AA.pdb	14.52		SimRNA Top1k	trna	SimRNA
159	0	trna_rpr_x_rprA_rpr_rpr_ref.pdb	c1_tar_a9bc516d-e3da-489d-93ef-5eb20e3f13c3_ALL-000001_AA.pdb	14.52		Rosetta+SimRNA	trna	SimRNA+Rosetta
185	0	trna_rpr_x_rprA_rpr_rpr_ref.pdb	c1_tar_a9bc516d-e3da-489d-93ef-5eb20e3f13c3_ALL-000004_AA.pdb	12.16		Evo|Rosetta+SimRNA	trna	SimRNA+Rosetta
177	0	trna_rpr_x_rprA_rpr_rpr_ref.pdb	c1_tar_trnapk-19c17b6c_ALL_top200-000034_AA.pdb	9.97		Evo|SimRNA	trna	SimRNA
164	0	trna_rpr_x_rprA_rpr_rpr_ref.pdb	c1_tar_a9bc516d-e3da-489d-93ef-5eb20e3f13c3_ALL_thrs7.60A_clust01-000001_AA.pdb	14.37		SimRNA	trna	SimRNA

## Sheet: rmsd_core_rnas_1of6
	index	target	fn	rmsd_motif	group_name	mode	rna	type
0	0	1y26_rpr_ref.pdb	c1_tar_min.out.10.pdb	13.89		Rosetta Top1k	ade	Rosetta
23	0	1y26_rpr_ref.pdb	c1_tar_min.out.10.pdb	13.89		Evo|Rosetta	ade	Rosetta
19	0	1y26_rpr_ref.pdb	c1_tar_c.0.0.pdb	7.32		Rosetta	ade	Rosetta
5	0	1y26_rpr_ref.pdb	c1_tar_ade_pk-35b2a2c1_ALL-000002_AA.pdb	7.52		SimRNA Top1k	ade	SimRNA
10	0	1y26_rpr_ref.pdb	c1_tar_ade_pk-35b2a2c1_ALL-000002_AA.pdb	7.52		Rosetta+SimRNA	ade	SimRNA+Rosetta
33	0	1y26_rpr_ref.pdb	c1_tar_ade_pk-35b2a2c1_ALL-000001_AA.pdb	8.35		Evo|Rosetta+SimRNA	ade	SimRNA+Rosetta
28	0	1y26_rpr_ref.pdb	c1_tar_ade_pk-35b2a2c1_ALL-000161_AA.pdb	9.55		Evo|SimRNA	ade	SimRNA
15	0	1y26_rpr_ref.pdb	c1_tar_ade_pk-35b2a2c1_ALL_thrs7.20A_clust01-000001_AA.pdb	5.09		SimRNA	ade	SimRNA
38	0	3q3z_rpr_ref.pdb	c1_tar_min.out.3.pdb	10.18		Rosetta Top1k	gmp	Rosetta
61	0	3q3z_rpr_ref.pdb	c1_gxx_min.out.9.pdb	15.85		Evo|Rosetta	gmp	Rosetta
57	0	3q3z_rpr_ref.pdb	c1_tar_c.0.0.pdb	11.41		Rosetta	gmp	Rosetta
43	0	3q3z_rpr_ref.pdb	c1_tar_faa97ed7_ALL-000002_AA.pdb	12.72		SimRNA Top1k	gmp	SimRNA
48	0	3q3z_rpr_ref.pdb	c1_tar_faa97ed7_ALL-000002_AA.pdb	12.72		Rosetta+SimRNA	gmp	SimRNA+Rosetta
71	0	3q3z_rpr_ref.pdb	c1_gxx_6bd26658_ALL-000001_AA.pdb	9.65		Evo|Rosetta+SimRNA	gmp	SimRNA+Rosetta
66	0	3q3z_rpr_ref.pdb	c1_gxx_6bd26658_ALL-000001_AA.pdb	9.65		Evo|SimRNA	gmp	SimRNA
53	0	3q3z_rpr_ref.pdb	c1_tar_3q3z+pk2-faa97ed7_ALL_thrs7.70A_clust01-000001_AA.pdb	12.26		SimRNA	gmp	SimRNA
190	0	target_13_solution_0_renumber_puzzle_ref.pdb	c1_tar_min.out.1.pdb	4.41		Rosetta Top1k	rp13	Rosetta
213	0	target_13_solution_0_renumber_puzzle_ref.pdb	c1_tar_min.out.1.pdb	4.41		Evo|Rosetta	rp13	Rosetta
209	0	target_13_solution_0_renumber_puzzle_ref.pdb	c1_tar_c.0.0.pdb	8.32		Rosetta	rp13	Rosetta
195	0	target_13_solution_0_renumber_puzzle_ref.pdb	c1_tar_20569fa1_ALL-000016_AA.pdb	7.69		SimRNA Top1k	rp13	SimRNA
200	0	target_13_solution_0_renumber_puzzle_ref.pdb	c1_tar_20569fa1_ALL-000003_AA.pdb	6.73		Rosetta+SimRNA	rp13	SimRNA+Rosetta
223	0	target_13_solution_0_renumber_puzzle_ref.pdb	c1_tar_20569fa1_ALL-000003_AA.pdb	6.73		Evo|Rosetta+SimRNA	rp13	SimRNA+Rosetta
218	0	target_13_solution_0_renumber_puzzle_ref.pdb	c1_tar_20569fa1_ALL-000003_AA.pdb	6.73		Evo|SimRNA	rp13	SimRNA
205	0	target_13_solution_0_renumber_puzzle_ref.pdb	c1_tar_zmp-pk2-20569fa1_ALL_thrs7.10A_clust01-000001_AA.pdb	6.42		SimRNA	rp13	SimRNA
228	0	target_rp14_5ddp_bound_clean_noL2_ref.pdb	c1_tar_min.out.1.pdb	4.83		Rosetta Top1k	rp14	Rosetta
251	0	target_rp14_5ddp_bound_clean_noL2_ref.pdb	c1_tar_min.out.1.pdb	4.83		Evo|Rosetta	rp14	Rosetta
247	0	target_rp14_5ddp_bound_clean_noL2_ref.pdb	c1_tar_c.0.0.pdb	4.52		Rosetta	rp14	Rosetta
233	0	target_rp14_5ddp_bound_clean_noL2_ref.pdb	c1_tar_rp14+m+pk2-946da607_ALL-000009_AA.pdb	7.13		SimRNA Top1k	rp14	SimRNA
238	0	target_rp14_5ddp_bound_clean_noL2_ref.pdb	c1_tar_min.out.1.pdb	4.83		Rosetta+SimRNA	rp14	SimRNA+Rosetta
261	0	target_rp14_5ddp_bound_clean_noL2_ref.pdb	c1_tar_min.out.96.pdb	3.75		Evo|Rosetta+SimRNA	rp14	SimRNA+Rosetta
256	0	target_rp14_5ddp_bound_clean_noL2_ref.pdb	c1_tar_rp14+m+pk2-946da607_ALL-000002_AA.pdb	4.45		Evo|SimRNA	rp14	SimRNA
243	0	target_rp14_5ddp_bound_clean_noL2_ref.pdb	c1_tar_rp14+m+pk2-946da607_ALL_thrs6.10A_clust01-000001_AA.pdb	4.71		SimRNA	rp14	SimRNA
266	0	5k7c_clean_onechain_renumber_as_puzzle_ref.pdb	c1_tar_min.out.1.pdb	13.37		Rosetta Top1k	rp17	Rosetta
289	0	5k7c_clean_onechain_renumber_as_puzzle_ref.pdb	c1_tar_min.out.1.pdb	13.37		Evo|Rosetta	rp17	Rosetta
285	0	5k7c_clean_onechain_renumber_as_puzzle_ref.pdb	c1_tar_c.0.0.pdb	14.26		Rosetta	rp17	Rosetta
271	0	5k7c_clean_onechain_renumber_as_puzzle_ref.pdb	c1_tar_948f56bb-ea7a-4619-9945-2fbfd6902c24_ALL-000003_AA.pdb	8.75		SimRNA Top1k	rp17	SimRNA
276	0	5k7c_clean_onechain_renumber_as_puzzle_ref.pdb	c1_tar_948f56bb-ea7a-4619-9945-2fbfd6902c24_ALL-000323_AA.pdb	12.89		Rosetta+SimRNA	rp17	SimRNA+Rosetta
299	0	5k7c_clean_onechain_renumber_as_puzzle_ref.pdb	c1_tar_27b5093d_ALL-000001_AA.pdb	16.64		Evo|Rosetta+SimRNA	rp17	SimRNA+Rosetta
294	0	5k7c_clean_onechain_renumber_as_puzzle_ref.pdb	c1_tar_27b5093d_ALL-000001_AA.pdb	16.64		Evo|SimRNA	rp17	SimRNA
281	0	5k7c_clean_onechain_renumber_as_puzzle_ref.pdb	c1_tar_rp17+pk2-27b5093d_ALL_thrs6.20A_clust01-000001_AA.pdb	16.72		SimRNA	rp17	SimRNA
76	0	4lvv_rpr_ref.pdb	c1_tar_min.out.7.pdb	5.05		Rosetta Top1k	thf	Rosetta
99	0	4lvv_rpr_ref.pdb	c1_tha_min.out.1.pdb	6.48		Evo|Rosetta	thf	Rosetta
95	0	4lvv_rpr_ref.pdb	c1_tar_c.0.0.pdb	4.83		Rosetta	thf	Rosetta
81	0	4lvv_rpr_ref.pdb	c1_tar_7f0f8826_ALL-000001_AA.pdb	11.02		SimRNA Top1k	thf	SimRNA
86	0	4lvv_rpr_ref.pdb	c1_tar_7f0f8826_ALL-000001_AA.pdb	11.02		Rosetta+SimRNA	thf	SimRNA+Rosetta
109	0	4lvv_rpr_ref.pdb	c1_tha_5f8916a8_ALL-000001_AA.pdb	11.35		Evo|Rosetta+SimRNA	thf	SimRNA+Rosetta
104	0	4lvv_rpr_ref.pdb	c1_tha_5f8916a8_ALL-000001_AA.pdb	11.35		Evo|SimRNA	thf	SimRNA
91	0	4lvv_rpr_ref.pdb	c1_tar_7f0f8826-thrs8.90A_clust01X.pdb	12.22		SimRNA	thf	SimRNA
114	0	target_tpp_2gdi_ba_rpr_renumb_chainA_ref.pdb	c1_tar_min.out.3.pdb	17.09		Rosetta Top1k	tpp	Rosetta
137	0	target_tpp_2gdi_ba_rpr_renumb_chainA_ref.pdb	c1_tar_min.out.2.pdb	13.92		Evo|Rosetta	tpp	Rosetta
133	0	target_tpp_2gdi_ba_rpr_renumb_chainA_ref.pdb	c1_tar_c.0.0.pdb	17.55		Rosetta	tpp	Rosetta
119	0	target_tpp_2gdi_ba_rpr_renumb_chainA_ref.pdb	c1_tar_16662ebf-cf31-42d1-98a3-2aae31f28087_ALL-000002_AA.pdb	24.08		SimRNA Top1k	tpp	SimRNA
124	0	target_tpp_2gdi_ba_rpr_renumb_chainA_ref.pdb	c1_tar_16662ebf-cf31-42d1-98a3-2aae31f28087_ALL-000002_AA.pdb	24.08		Rosetta+SimRNA	tpp	SimRNA+Rosetta
147	0	target_tpp_2gdi_ba_rpr_renumb_chainA_ref.pdb	c1_tar_16662ebf-cf31-42d1-98a3-2aae31f28087_ALL-000002_AA.pdb	24.08		Evo|Rosetta+SimRNA	tpp	SimRNA+Rosetta
142	0	target_tpp_2gdi_ba_rpr_renumb_chainA_ref.pdb	c1_tar_16662ebf-cf31-42d1-98a3-2aae31f28087_ALL-000002_AA.pdb	24.08		Evo|SimRNA	tpp	SimRNA
129	0	target_tpp_2gdi_ba_rpr_renumb_chainA_ref.pdb	c1_tar_tpp_16662ebf_ALL_thrs8.00A_clust01-000001_AA.pdb	22.37		SimRNA	tpp	SimRNA
152	0	trna_rpr_x_rprA_rpr_rpr_ref.pdb	c1_tar_min.out.3.pdb	14.6		Rosetta Top1k	trna	Rosetta
175	0	trna_rpr_x_rprA_rpr_rpr_ref.pdb	c1_tar_min.out.5.pdb	14		Evo|Rosetta	trna	Rosetta
171	0	trna_rpr_x_rprA_rpr_rpr_ref.pdb	c1_tar_c.0.0.pdb	13.11		Rosetta	trna	Rosetta
157	0	trna_rpr_x_rprA_rpr_rpr_ref.pdb	c1_tar_a9bc516d-e3da-489d-93ef-5eb20e3f13c3_ALL-000001_AA.pdb	14.52		SimRNA Top1k	trna	SimRNA
162	0	trna_rpr_x_rprA_rpr_rpr_ref.pdb	c1_tar_a9bc516d-e3da-489d-93ef-5eb20e3f13c3_ALL-000193_AA.pdb	13.9		Rosetta+SimRNA	trna	SimRNA+Rosetta
185	0	trna_rpr_x_rprA_rpr_rpr_ref.pdb	c1_tar_min.out.29.pdb	13.17		Evo|Rosetta+SimRNA	trna	SimRNA+Rosetta
181	1	trna_rpr_x_rprA_rpr_rpr_ref.pdb	c1_taf_822df074-320e-4166-9fd1-8fbcf085908a_ALL-000020_AA.pdb	12.26		Evo|SimRNA	trna	SimRNA
167	0	trna_rpr_x_rprA_rpr_rpr_ref.pdb	c1_tar_a9bc516d-e3da-489d-93ef-5eb20e3f13c3_ALL_thrs7.60A_clust01-000001_AA.pdb	14.37		SimRNA	trna	SimRNA
